# Supplementary material for: Translocated Legionella pneumophila small RNAs mimic eukaryotic microRNAs targeting the host immune response
Source: PubMed Central journal article supplement (PMC8828724; doi:10.1038/s41467-022-28454-x), 2022-02-09
Supplement: 41467_2022_28454_MOESM3_ESM.pdf [file 41467_2022_28454_MOESM3_ESM.pdf]

## Description of Additional Supplementary Files

**Supplementary Data 1:** Thirty-nine RNA molecules identified as enriched in Lp-EVs.

### **Supplementary Movie 1: related to Supplementary Figure 3A**

3D Confocal Time-Lapse Movie of a U2OS Sec61 $\beta$ -GFP cell infected with *L. pneumophila* labelled with DiD dye. The movie shows during a time course of 18 min (one image every 30 sec) a DiD-stained *L. pneumophila* bacterium (in white) that sheds several potential Lp-EVs during infection.

### **Supplementary Movie 2: related to Supplementary Figure 3B**

3D Confocal Time-Lapse Movie of a U2OS cell labelled with Rab5 and Rab7 CellLight and incubated with DiD-labelled Lp-EVs purified from *L. pneumophila* wt grown until post-exponential phase ( $OD=4.2$ ). The video shows during 20 min (one image every minute) a single Lp-EV contained within a red Rab5 early endosome that is progressively matured to a green Rab7 late endosome.
