# Supplementary material for: Translocated Legionella pneumophila small RNAs mimic eukaryotic microRNAs targeting the host immune response
Source: PubMed Central journal article supplement (PMC8828724; doi:10.1038/s41467-022-28454-x), 2022-02-09
Supplement: 41467_2022_28454_MOESM7_ESM.pdf [file 41467_2022_28454_MOESM7_ESM.pdf]

## Reporting Summary

Nature Portfolio wishes to improve the reproducibility of the work that we publish. This form provides structure for consistency and transparency in reporting. For further information on Nature Portfolio policies, see our [Editorial Policies](#) and the [Editorial Policy Checklist](#).

### Statistics

For all statistical analyses, confirm that the following items are present in the figure legend, table legend, main text, or Methods section.

- |     |           |
|-----|-----------|
| n/a | Confirmed |
|-----|-----------|
- The exact sample size ( $n$ ) for each experimental group/condition, given as a discrete number and unit of measurement
  - A statement on whether measurements were taken from distinct samples or whether the same sample was measured repeatedly
  - The statistical test(s) used AND whether they are one- or two-sided  
*Only common tests should be described solely by name; describe more complex techniques in the Methods section.*
  - A description of all covariates tested
  - A description of any assumptions or corrections, such as tests of normality and adjustment for multiple comparisons
  - A full description of the statistical parameters including central tendency (e.g. means) or other basic estimates (e.g. regression coefficient) AND variation (e.g. standard deviation) or associated estimates of uncertainty (e.g. confidence intervals)
  - For null hypothesis testing, the test statistic (e.g.  $F$ ,  $t$ ,  $r$ ) with confidence intervals, effect sizes, degrees of freedom and  $P$  value noted  
*Give  $P$  values as exact values whenever suitable.*
  - For Bayesian analysis, information on the choice of priors and Markov chain Monte Carlo settings
  - For hierarchical and complex designs, identification of the appropriate level for tests and full reporting of outcomes
  - Estimates of effect sizes (e.g. Cohen's  $d$ , Pearson's  $r$ ), indicating how they were calculated

*Our web collection on [statistics for biologists](#) contains articles on many of the points above.*

### Software and code

Policy information about [availability of computer code](#)

Data collection

Data analysis

For manuscripts utilizing custom algorithms or software that are central to the research but not yet described in published literature, software must be made available to editors and reviewers. We strongly encourage code deposition in a community repository (e.g. GitHub). See the Nature Portfolio [guidelines for submitting code & software](#) for further information.

### Data

Policy information about [availability of data](#)

All manuscripts must include a [data availability statement](#). This statement should provide the following information, where applicable:

- Accession codes, unique identifiers, or web links for publicly available datasets
- A description of any restrictions on data availability
- For clinical datasets or third party data, please ensure that the statement adheres to our [policy](#)

RNAseq data have been deposited at NCBI Gene Expression Omnibus (GEO) database under accession number GSE159109 (<https://www.ncbi.nlm.nih.gov/geo/query/acc.cgi?acc=GSE159109>) and GSE190376 (<https://www.ncbi.nlm.nih.gov/geo/query/acc.cgi?acc=GSE190376>), Flow cytometry data have been deposited at <https://flowrepository.org/> under accession numbers FR-FCM-Z2XL and FR-FCM-Z2XM, human genome sequence build GRCh38, <http://www.mirbase.org/search.shtml> (Release 22.1: October 2018) [http://diana.imis.athena-innovation.gr/DianaTools/index.php?r=microT\\_CDS/index](http://diana.imis.athena-innovation.gr/DianaTools/index.php?r=microT_CDS/index) (Version 5.0) were used

## Field-specific reporting

Please select the one below that is the best fit for your research. If you are not sure, read the appropriate sections before making your selection.

Life sciences  Behavioural & social sciences  Ecological, evolutionary & environmental sciences

For a reference copy of the document with all sections, see [nature.com/documents/nr-reporting-summary-flat.pdf](https://www.nature.com/documents/nr-reporting-summary-flat.pdf)

## Life sciences study design

All studies must disclose on these points even when the disclosure is negative.

|                 |                                                                                                      |
|-----------------|------------------------------------------------------------------------------------------------------|
| Sample size     | Not applicable                                                                                       |
| Data exclusions | No data have been excluded                                                                           |
| Replication     | Experiments were replicated as stated in the methods section and figure legends but at least 3 times |
| Randomization   | There was no randomization                                                                           |
| Blinding        | No blinding was performed.                                                                           |

## Reporting for specific materials, systems and methods

We require information from authors about some types of materials, experimental systems and methods used in many studies. Here, indicate whether each material, system or method listed is relevant to your study. If you are not sure if a list item applies to your research, read the appropriate section before selecting a response.

| Materials & experimental systems    |                                                           | Methods                             |                                                    |
|-------------------------------------|-----------------------------------------------------------|-------------------------------------|----------------------------------------------------|
| n/a                                 | Included in the study                                     | n/a                                 | Included in the study                              |
| <input type="checkbox"/>            | <input checked="" type="checkbox"/> Antibodies            | <input checked="" type="checkbox"/> | <input type="checkbox"/> ChIP-seq                  |
| <input type="checkbox"/>            | <input checked="" type="checkbox"/> Eukaryotic cell lines | <input type="checkbox"/>            | <input checked="" type="checkbox"/> Flow cytometry |
| <input checked="" type="checkbox"/> | <input type="checkbox"/> Palaeontology and archaeology    | <input checked="" type="checkbox"/> | <input type="checkbox"/> MRI-based neuroimaging    |
| <input checked="" type="checkbox"/> | <input type="checkbox"/> Animals and other organisms      |                                     |                                                    |
| <input checked="" type="checkbox"/> | <input type="checkbox"/> Human research participants      |                                     |                                                    |
| <input checked="" type="checkbox"/> | <input type="checkbox"/> Clinical data                    |                                     |                                                    |
| <input checked="" type="checkbox"/> | <input type="checkbox"/> Dual use research of concern     |                                     |                                                    |

## Antibodies

|                 |                                                                                                                                                                                                                                                                                                                                                                                                                                                                                                                                                                                                                                                                                                                                                                                                                                                                                                                                                                                                                                                                                                                                                                                                                                                                                                                                                                                                                                                                                                                                                                                                                                                                                                                                                                                                                                                                                                                                                                                                                                                                                                                                                                                                                                                                                                                                                                                                                                                                                                                                                                                                                                                                                                                                                    |
|-----------------|----------------------------------------------------------------------------------------------------------------------------------------------------------------------------------------------------------------------------------------------------------------------------------------------------------------------------------------------------------------------------------------------------------------------------------------------------------------------------------------------------------------------------------------------------------------------------------------------------------------------------------------------------------------------------------------------------------------------------------------------------------------------------------------------------------------------------------------------------------------------------------------------------------------------------------------------------------------------------------------------------------------------------------------------------------------------------------------------------------------------------------------------------------------------------------------------------------------------------------------------------------------------------------------------------------------------------------------------------------------------------------------------------------------------------------------------------------------------------------------------------------------------------------------------------------------------------------------------------------------------------------------------------------------------------------------------------------------------------------------------------------------------------------------------------------------------------------------------------------------------------------------------------------------------------------------------------------------------------------------------------------------------------------------------------------------------------------------------------------------------------------------------------------------------------------------------------------------------------------------------------------------------------------------------------------------------------------------------------------------------------------------------------------------------------------------------------------------------------------------------------------------------------------------------------------------------------------------------------------------------------------------------------------------------------------------------------------------------------------------------------|
| Antibodies used | Argonaute 2 (C34C6) Cell Signaling 2897 1:50 <a href="https://media.cellsignal.com/coa/2897/2897-coa.pdf">https://media.cellsignal.com/coa/2897/2897-coa.pdf</a><br>Normal Rabbit IgG Cell Signaling 2792 1:50 <a href="https://media.cellsignal.com/coa/2792/2792-coa.pdf">https://media.cellsignal.com/coa/2792/2792-coa.pdf</a><br>RIG-I (D14G6) Cell Signaling 3743 1:1000 <a href="https://media.cellsignal.com/coa/3743/3743-coa.pdf">https://media.cellsignal.com/coa/3743/3743-coa.pdf</a><br>IRAK1 (D51G7) Cell Signaling 4504 1:1000 <a href="https://media.cellsignal.com/coa/4504/4504-coa.pdf">https://media.cellsignal.com/coa/4504/4504-coa.pdf</a><br>c-Rel Cell Signaling 4727 1:1000 <a href="https://media.cellsignal.com/coa/4727/4727-coa.pdf">https://media.cellsignal.com/coa/4727/4727-coa.pdf</a><br>P-TBK1/NAK (Ser172) (D52C2) Cell Signaling 5483 1:1000 <a href="https://media.cellsignal.com/coa/5483/5483-coa.pdf">https://media.cellsignal.com/coa/5483/5483-coa.pdf</a><br>P-IRF3 (Ser396) (4D4G) Cell Signaling 4947 1:1000 <a href="https://www.cellsignal.com/products/primary-antibodies/phospho-irf-3-ser396-4d4g-rabbit-mab/4947">https://www.cellsignal.com/products/primary-antibodies/phospho-irf-3-ser396-4d4g-rabbit-mab/4947</a><br>P-IRF7 (Ser471/472) Cell Signaling 5184 1:1000 <a href="https://www.cellsignal.com/products/primary-antibodies/phospho-irf-7-ser471-472-antibody/5184">https://www.cellsignal.com/products/primary-antibodies/phospho-irf-7-ser471-472-antibody/5184</a><br>P-IkBa (Ser32/36) (5A5) Cell Signaling 9246 1:1000 <a href="https://media.cellsignal.com/coa/9246/9246-coa.pdf">https://media.cellsignal.com/coa/9246/9246-coa.pdf</a><br>P-NF-kB p65 (Ser536) (93H1) Cell Signaling 3033 1:1000 <a href="https://media.cellsignal.com/coa/3033/3033-coa.pdf">https://media.cellsignal.com/coa/3033/3033-coa.pdf</a><br>Anti-rabbit IgG, HRP-linked Cell Signaling 7074 1:5000 <a href="https://media.cellsignal.com/coa/7074/7074-coa.pdf">https://media.cellsignal.com/coa/7074/7074-coa.pdf</a><br>Anti-mouse IgG, HRP-linked Cell Signaling 7076 1:5000 <a href="https://media.cellsignal.com/coa/7076/7076-coa.pdf">https://media.cellsignal.com/coa/7076/7076-coa.pdf</a><br>RhoGDIa (A20) Santa Cruz Biotechnology sc-360 1:2000 <a href="https://www.citeab.com/antibodies/826384-sc-360-rho-gdi-antibody-a-20">https://www.citeab.com/antibodies/826384-sc-360-rho-gdi-antibody-a-20</a><br>Biotin Monoclonal Antibody (Z021) Invitrogen 033700 1:2000 <a href="https://www.thermofisher.com/antibody/product/Biotin-Antibody-clone-Z021-Monoclonal/03-3700">https://www.thermofisher.com/antibody/product/Biotin-Antibody-clone-Z021-Monoclonal/03-3700</a> |
| Validation      | We did not validate any of our antibodies but we relied on the validation done by the manufacturer. Please find here each technical data sheet of the manufacturer with the description of the validation<br><a href="https://media.cellsignal.com/coa/2897/2897-coa.pdf">https://media.cellsignal.com/coa/2897/2897-coa.pdf</a><br><a href="https://media.cellsignal.com/coa/2792/2792-coa.pdf">https://media.cellsignal.com/coa/2792/2792-coa.pdf</a><br><a href="https://media.cellsignal.com/coa/3743/3743-coa.pdf">https://media.cellsignal.com/coa/3743/3743-coa.pdf</a><br><a href="https://media.cellsignal.com/coa/4504/4504-coa.pdf">https://media.cellsignal.com/coa/4504/4504-coa.pdf</a><br><a href="https://media.cellsignal.com/coa/4727/4727-coa.pdf">https://media.cellsignal.com/coa/4727/4727-coa.pdf</a>                                                                                                                                                                                                                                                                                                                                                                                                                                                                                                                                                                                                                                                                                                                                                                                                                                                                                                                                                                                                                                                                                                                                                                                                                                                                                                                                                                                                                                                                                                                                                                                                                                                                                                                                                                                                                                                                                                                       |

<https://media.cellsignal.com/coa/5483/5483-coa.pdf>  
<https://www.cellsignal.com/products/primary-antibodies/phospho-irf-3-ser396-4d4g-rabbit-mab/4947>  
<https://www.cellsignal.com/products/primary-antibodies/phospho-irf-7-ser471-472-antibody/5184>  
<https://media.cellsignal.com/coa/9246/9246-coa.pdf>  
<https://media.cellsignal.com/coa/3033/3033-coa.pdf>  
<https://media.cellsignal.com/coa/7074/7074-coa.pdf>  
<https://media.cellsignal.com/coa/7076/7076-coa.pdf>  
<https://www.citeab.com/antibodies/826384-sc-360-rho-gdi-antibody-a-20>  
<https://www.thermofisher.com/antibody/product/Biotin-Antibody-clone-Z021-Monoclonal/03-3700>

## Eukaryotic cell lines

### Policy information about cell lines

|                                                                      |                                                                                                                                                                            |
|----------------------------------------------------------------------|----------------------------------------------------------------------------------------------------------------------------------------------------------------------------|
| Cell line source(s)                                                  | Cell lines used were THP-1 purchased from ATCC and U2OS-Sec61 $\beta$ cells published in Proc Natl Acad Sci U S A. 2016 Feb 16;113(7):1901-6. doi: 10.1073/pnas.1522067113 |
| Authentication                                                       | Standard cell lines were used, no particular authentication process was conducted                                                                                          |
| Mycoplasma contamination                                             | All cell lines were tested for Mycoplasma contamination and tested negative                                                                                                |
| Commonly misidentified lines<br>(See <a href="#">ICLAC</a> register) | We did not use any commonly misidentified cell lines in this study                                                                                                         |

## Flow Cytometry

### Plots

Confirm that:

- The axis labels state the marker and fluorochrome used (e.g. CD4-FITC).
- The axis scales are clearly visible. Include numbers along axes only for bottom left plot of group (a 'group' is an analysis of identical markers).
- All plots are contour plots with outliers or pseudocolor plots.
- A numerical value for number of cells or percentage (with statistics) is provided.

### Methodology

|                           |                                                                                                                                                                                                                                                                                                                                                                                                                                                                                                                                                                                                                                                                                                                                                                                                                                                                                                                                                                                                                                                                                                        |
|---------------------------|--------------------------------------------------------------------------------------------------------------------------------------------------------------------------------------------------------------------------------------------------------------------------------------------------------------------------------------------------------------------------------------------------------------------------------------------------------------------------------------------------------------------------------------------------------------------------------------------------------------------------------------------------------------------------------------------------------------------------------------------------------------------------------------------------------------------------------------------------------------------------------------------------------------------------------------------------------------------------------------------------------------------------------------------------------------------------------------------------------|
| Sample preparation        | The samples were prepared as described in the M&M section. <i>L. pneumophila</i> strains were grown in BYE until post-exponential phase (OD4.2). Bacterial cells were harvested by centrifugation at 5.000xg, 4°C for 15 min and the pellet was frozen at -80°C for further use. The supernatant was twice passed through a 0.2 $\mu$ m PES membrane Stericup® Quick Release (Millipore) and re-centrifuged for 15min at 15.000xg, 4°C. The supernatant was treated with RNaseA/T1 (Thermo Scientific) at a final concentration of 2 $\mu$ g/ml RNaseA for 1h at 37°C followed by centrifugation at 150.000xg for 2h at 4°C to pellet the Lp-EVs. The Lp-EV-pellet was washed, re-centrifuged and resuspended in PBS. For incubation experiments with U2OS or hMDM for FISH, the purified Lp-EVs were labelled with Vybrant DiD-dye (Thermo Scientific), 30min at 37°C and subsequently cleaned-up using Exosome Spin Columns (MW3000, Thermo Scientific) for removal of unincorporated dye. Human cells were incubated with Lp-EVs at an MOI of 10 (according to flow cytometry dye-labelled events). |
| Instrument                | MACSQuant flow cytometer and ZetaView® QUATT                                                                                                                                                                                                                                                                                                                                                                                                                                                                                                                                                                                                                                                                                                                                                                                                                                                                                                                                                                                                                                                           |
| Software                  | The data were analysed with FlowJo software                                                                                                                                                                                                                                                                                                                                                                                                                                                                                                                                                                                                                                                                                                                                                                                                                                                                                                                                                                                                                                                            |
| Cell population abundance | We did not sort any populations thus no post sort fractions details can be given                                                                                                                                                                                                                                                                                                                                                                                                                                                                                                                                                                                                                                                                                                                                                                                                                                                                                                                                                                                                                       |
| Gating strategy           | Figure S1B shows representative flow cytometry results showing labelling and gating strategies to evaluate the SSC resolution of purified Lp-EVs to analyse size-related parameters. a) Column A shows a representative control experiment using DiD dye in PBS alone, to be able to distinguish Lp-EVs from the background noise. b) Column B shows Lp-EVs labelled with DiD dye (PE-Vio770-H channel). c) Optimization of the cytometer settings for discriminating the 4 individual peaks of the green fluorescent Megamix-Plus SSC beads (GFP-FITC-H channel). d) Adjustments were used to characterize stained standardization beads and Lp-EVs, to determine the approximate diameter represented as a side scatter SSC-H x count histogram                                                                                                                                                                                                                                                                                                                                                      |

- Tick this box to confirm that a figure exemplifying the gating strategy is provided in the Supplementary Information.
